# Supplementary material for: Quercetin delivery to porcine cornea and sclera by solid lipid nanoparticles and nanoemulsion
Source: Royal Society of Chemistry journal article supplement (doi:10.1039/c5ra17423f), 2015-01-01
Supplement: c5ra17423f1.pdf [file c5ra17423f1.pdf]

## 1 Supplementary information

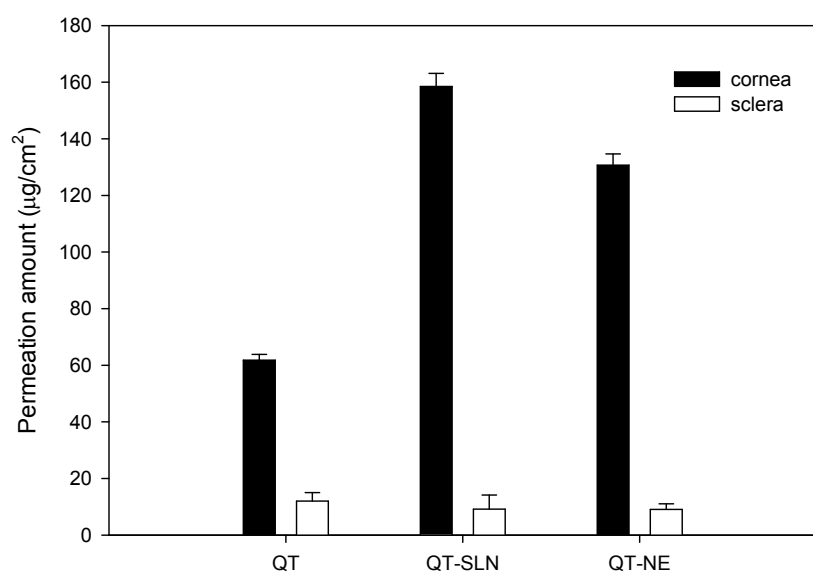

2

3 Fig S1. The permeation of quercetin in cornea and sclera by using nanocarriers after 24 hours.

4

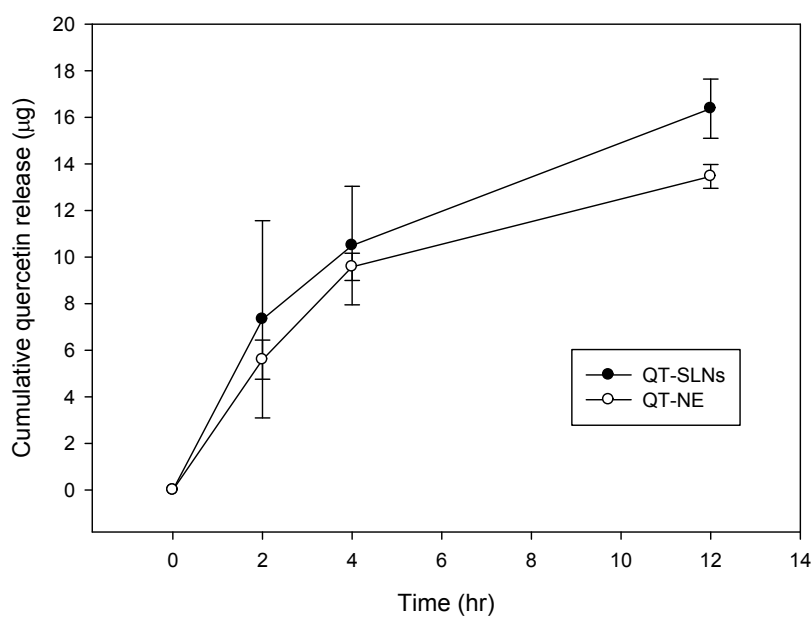

5

6 Fig S2. The release of quercetin in simulated tear fluid by using nanocarriers.

7 In vitro release studies of quercetin were performed in static Franz diffusion cells. The cell consisted of  
8 donor and receptor chambers between which a membrane was positioned. A PVDF membrane (Millipore,  
9 Germany) with an average pore size of 100nm was used as a barrier to prevent the entrance of nanocarriers  
10 to the receptor liquid. Total volume of 1 ml dispersion (containing 2000µg quercetin) was applied to the  
11 donor compartment. The composition of simulated tear fluid includes sodium bicarbonate (0.20%), calcium  
12 chloride (0.01%), sodium chloride (0.67%) and water (99.12%). The receptor fluid (5.5 mL) consisted of  
13 simulated tear: ethanol (4:1) (v/v). The addition of 20% ethanol in the receptor medium was chosen because  
14 of the insufficient solubility of lutein in aqueous buffer. Each receptor chamber contained a stirring magnetic  
15 bar to maintain the solution homogeneity. The temperature of receptor chamber was controlled at 32 °C by a  
16 water circulator. The whole buffer in the receptor chamber was taken and fresh buffer was replenished at  
17 fixed intervals. Quercetin in the receptor chamber was analyzed by HPLC.

1

2 Table S1. Comparative summary for QT-SLNs and QT-NE

|                                                        | QT-SLNs | QT-NE |
|--------------------------------------------------------|---------|-------|
| Size by TEM (nm)                                       | 324.2   | 162.7 |
| Corneal penetration depth ( $\mu\text{m}$ )            | 75      | 60    |
| Scleral penetration depth ( $\mu\text{m}$ )            | 60      | 30    |
| Protection against $\text{H}_2\text{O}_2$ in SIRC      | good    | fair  |
| Protection against $\text{H}_2\text{O}_2$ in RGC       | good    | fair  |
| Corneal flux ( $\mu\text{g cm}^{-2} \text{day}^{-1}$ ) | 158.5   | 130.7 |
| Scleral flux ( $\mu\text{g cm}^{-2} \text{day}^{-1}$ ) | 9.2     | 9.1   |
| $\text{IC}_{50}$ in SIRC ( $\mu\text{g mL}^{-1}$ )     | 268.8   | 168.4 |
| $\text{IC}_{50}$ in RGC ( $\mu\text{g mL}^{-1}$ )      | 211.3   | 113.1 |

3

4

5

6
